# Supplementary material for: Polyurethane-based bulk nanocomposites from 1-thioglycerol-stabilized CdTe quantum dots with enhanced luminescence
Source: Royal Society of Chemistry journal article supplement (doi:10.1039/c0jm04425c), 2011-01-01

## **Supporting Information:**

### **Polyurethane-based Bulk Nanocomposites from 1-Thioglycerol-Stabilized CdTe Quantum Dots with Enhanced Luminescence**

*Xintao Luo, Jishu Han, Yang Ning, Zhe Lin, Hao Zhang<sup>\*</sup>, Bai Yang*

*State Key Laboratory of Supramolecular Structure and Materials, College of Chemistry,*

*Jilin University, Changchun 130012, P. R. China*

*E-mail: hao\_zhang@jlu.edu.cn*

**Figure S1** UV-vis absorption (a) and PL (b) spectra of TG-stabilized CdTe QDs dispersed in DMSO. The original PL peak positions of these QDs were at 525, 555, 590, and 620nm as indicated in Figure 1. (c) TEM image of the QDs in DMSO with the emission at 590nm. The corresponding TEM image of aqueous QDs was indicated in Figure 2c.

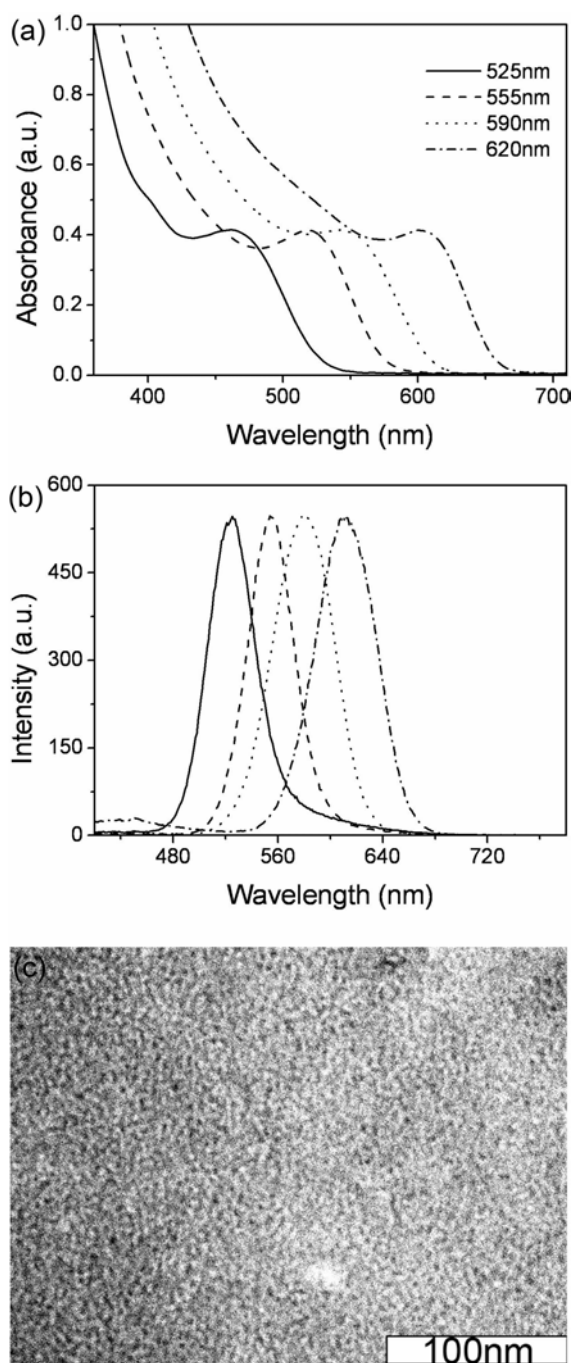

**Figure S2** Thermogravimetric analysis curve of QD-PU nanocomposites.

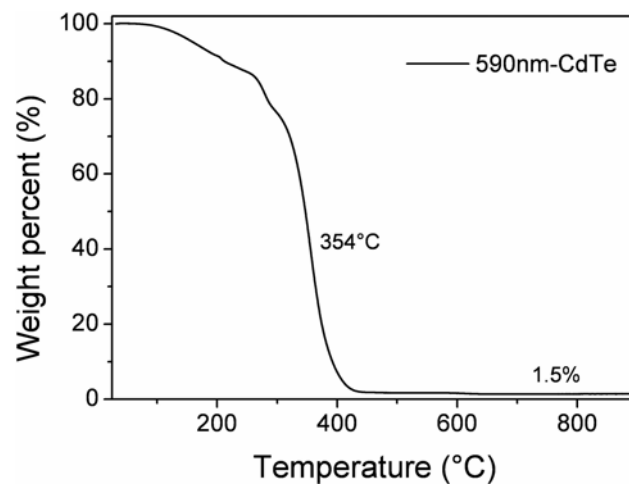

**Figure S3** PL spectra of QD-PU nanocomposites with different QD concentration. The TG-stabilized QDs with the emitting at 555nm were synthesized in the presence of 10mol/L  $\text{N}_2\text{H}_4$  at 50°C. In the fabrication of the composites, 0.1, 0.3, and 0.5ml QD DMSO solution were respectively mixed with fixed PU prepolymers and solidified under the same conditions.

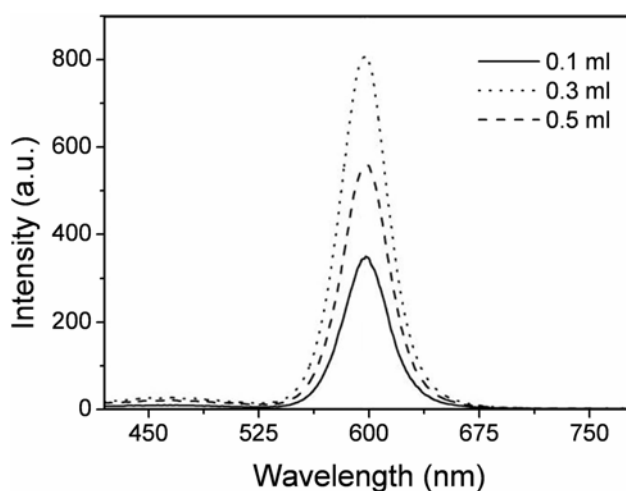

Supplement: c0jm04425c.pdf [file c0jm04425c.pdf]
